# Supplementary material for: Indicator opportunistic infections after biological treatment in rheumatoid arthritis, 10 years follow-up in a real-world setting
Source: PubMed Central journal article supplement — Ther Adv Musculoskelet Dis. 2019 Oct 7;11:1759720X19878004. doi: 10.1177/1759720X19878004 (PMC6783660; doi:10.1177/1759720x19878004), 2019-10-07
Supplement: Supplementary_table1_rev.pdf [file Supplementary_table1_rev.pdf]

**Supplementary table 1: Summary of IOIbs**

| <b>IOIb</b>                         | <b>N (%)</b> | <b>Level of evidence*</b><br><b>(I low-V high, NC not clear)</b> |
|-------------------------------------|--------------|------------------------------------------------------------------|
| Viral infections (n)                | 25 (67.5)    |                                                                  |
| Herpes zoster                       | 18           | II                                                               |
| VHC reactivation                    | 3            | V                                                                |
| VHB reactivation                    | 2            | IV                                                               |
| CMV                                 | 1            | V                                                                |
| Epstein-Barr Virus                  | 1            | NC                                                               |
| Fungal infections                   | 6 (16.2)     |                                                                  |
| Invasive-oropharyngeal candidiasis  | 5            | II                                                               |
| Dermatophytosis by Trichophyton spp | 1            | NC                                                               |
| Bacterial infections                | 5 (13.5)     |                                                                  |
| Tuberculosis                        | 3            | I                                                                |
| Salmonellosis                       | 1            | II                                                               |
| Legionellosis                       | 1            | II                                                               |
| Parasitic infections                | 1(2.7)       |                                                                  |
| Leishmaniasis                       | 1            | IV                                                               |

\* For each pathogen, using the Oxford evidence based medicine criteria, a level of evidence was agreed upon with regards to its particular association with biologic therapy.
