# Supplementary material for: Indicator opportunistic infections after biological treatment in rheumatoid arthritis, 10 years follow-up in a real-world setting
Source: PubMed Central journal article supplement — Ther Adv Musculoskelet Dis. 2019 Oct 7;11:1759720X19878004. doi: 10.1177/1759720X19878004 (PMC6783660; doi:10.1177/1759720x19878004), 2019-10-07
Supplement: Supplementary_table2_rev.pdf [file Supplementary_table2_rev.pdf]

**Supplementary table 2:** IOIbs associated factors: Bivariate analysis

|                                             | Total ADRs |            |       |
|---------------------------------------------|------------|------------|-------|
|                                             | HR         | 95%CI      | p     |
| Age, years                                  | 1.02       | 1.01-1.05  | 0.04  |
| Sex, male                                   | 2.21       | 1.05-4.62  | 0.03  |
| Disease duration, years                     | 1.03       | 0.98-1.08  | 0.21  |
| Married                                     | 1.10       | 0.50-2.42  | 0.80  |
| No studies or primary school                | 1.26       | 0.58-2.70  | 0.54  |
| Tobacco                                     | 0.92       | 0.32-2.57  | 0.87  |
| Five-year period:                           |            |            |       |
| 2007-2012                                   | 1          | -          | -     |
| 2002-2003                                   | 0.45       | 0.15-1.34  | 0.15  |
| Positive ACPA                               | 1.001      | 0.99-1.01  | 0.49  |
| Positive RF                                 | 1.75       | 0.72-4.22  | 0.21  |
| Hemoglobine                                 | 0.91       | 0.66-1.25  | 0.57  |
| Baseline DAS > 5.1                          | 0.97       | 1.40-2.74  | 0.87  |
| ESR                                         | 1.003      | 0.99-1.01  | 0.53  |
| Baseline HAQ >1.5                           | 1.04       | 0.69-1.57  | 0.82  |
| Lymphocyte count ≤1500cells/mm <sup>3</sup> | 0.99       | 0.99-0.99  | 0.03  |
| Baseline Comorbid conditions                |            |            |       |
| Hypertension                                | 1.51       | 0.22-10.14 | 0.66  |
| Hypercholesterolemia                        | 1.71       | 0.26-11.87 | 0.55  |
| Congestive heart failure                    | 1.71       | 0.26-11.12 | 0.57  |
| Diabetes Mellitus                           | 1.53       | 0.23-9.97  | 0.65  |
| Cancer                                      | 1.73       | 0.26-11.24 | 0.56  |
| Depression                                  | 1.70       | 0.26-11.01 | 0.57  |
| Renal failure                               | 1.75       | 0.27-11.33 | 0.55  |
| Osteoporosis                                | 1.19       | 0.17-7.97  | 0.85  |
| COPD                                        | 1.52       | 0.7-3.5    | 0.26  |
| Liver disease                               | 1.52       | 0.23-9.78  | 0.65  |
| Corticosteroids                             | 2.26       | 1.34-2.82  | 0.002 |
| Concomitant DMARDs                          | 1.01       | 0.66-1.56  | 0.93  |
| No anti-TNF                                 | 1.78       | 0.83-3.81  | 0.13  |

| <b>Biologic Agents:</b>     |      |           |       |
|-----------------------------|------|-----------|-------|
| <b>Etanercept/Golimumab</b> | 1    | -         | -     |
| <b>Adalimumab</b>           | 1.31 | 0.52-3.24 | 0.55  |
| <b>Infliximab</b>           | 1.71 | 0.43-6.69 | 0.43  |
| <b>Certolizumab</b>         | 2.38 | 0.65-8.71 | 0.18  |
| <b>Rituximab</b>            | 2.96 | 1.14-7.68 | 0.026 |
| <b>Tocilizumab</b>          | 0.98 | 0.12-7.55 | 0.98  |
| <b>Abatacept</b>            | 1.74 | 0.35-8.57 | 0.49  |

HR=hazard ratio, CI=confidence interval.
